# Supplementary material for: Metabolite Signature of Physical Activity and the Risk of Type 2 Diabetes in 7271 Men
Source: MDPI journal article supplement (doi:10.3390/metabo12010069), 2022-01-12
Supplement: s1 [file s1]

**Table S1.** Statistically significant ( $P < 3.9 \times 10^{-05}$ ) differences in metabolite groups of the participants having low physical activity (Group 1, a little or no physical activity or physical activity in context of other hobbies) and high physical activity (Group 2, physical activity regularly  $\leq 2$  times a week at least 30 min at a time or physical activity regularly  $\geq 3$  times a week at least 30 min at a time).

| METABOLITE*                                 | SUBCLASS        | GROUP | N    | Mean   | SD    | p**      |
|---------------------------------------------|-----------------|-------|------|--------|-------|----------|
| Lipids and lipid-like molecules             |                 |       |      |        |       |          |
| Carotenoids                                 |                 |       |      |        |       |          |
| Beta-Cryptoxanthin                          | Tetraterpenoids | 1     | 2408 | -0,088 | 0,400 | 2,01E-33 |
|                                             |                 | 2     | 4699 | 0,027  | 0,369 |          |
| Carotenediol(2)                             | Tetraterpenoids | 1     | 2474 | -0,040 | 0,198 | 1,02E-27 |
|                                             |                 | 2     | 4778 | 0,012  | 0,188 |          |
| Carotenediol(1)                             | Tetraterpenoids | 1     | 2484 | -0,036 | 0,190 | 1,22E-22 |
|                                             |                 | 2     | 4787 | 0,009  | 0,182 |          |
| Carotenediol(3)                             | Tetraterpenoids | 1     | 1980 | -0,031 | 0,253 | 8,54E-10 |
|                                             |                 | 2     | 3776 | 0,012  | 0,247 |          |
| Glycerolipids                               |                 |       |      |        |       |          |
| Oleoyl-Oleoyl-Glycerol(18:1/18:1)[2]*       | Diacylglycerol  | 1     | 1686 | 0,049  | 0,250 | 1,50E-20 |
|                                             |                 | 2     | 3110 | -0,021 | 0,248 |          |
| Oleoyl-Oleoyl-Glycerol(18:1/18:1)[1]*       | Diacylglycerol  | 1     | 1542 | 0,039  | 0,259 | 3,21E-15 |
|                                             |                 | 2     | 2779 | -0,025 | 0,256 |          |
| Palmitoyl-Oleoyl-Glycerol(16:0/18:1)[2]*    | Diacylglycerol  | 1     | 1372 | 0,048  | 0,296 | 4,73E-15 |
|                                             |                 | 2     | 2479 | -0,028 | 0,280 |          |
| Palmitoleoyl-Oleoyl-Glycerol(16:1/18:1)[2]* | Diacylglycerol  | 1     | 1459 | 0,049  | 0,348 | 1,53E-13 |
|                                             |                 | 2     | 2739 | -0,033 | 0,338 |          |
| Oleoyl-Arachidonoyl-Glycerol(18:1/20:4)[1]* | Diacylglycerol  | 1     | 2391 | 0,028  | 0,229 | 2,26E-13 |
|                                             |                 | 2     | 4607 | -0,014 | 0,227 |          |
| Diacylglycerol(14:0/18:1,16:0/16:1)[1]*     | Diacylglycerol  | 1     | 1240 | 0,054  | 0,330 | 4,13E-13 |
|                                             |                 | 2     | 2311 | -0,030 | 0,324 |          |
| Diacylglycerol(14:0/18:1,16:0/16:1)[2]*     | Diacylglycerol  | 1     | 1252 | 0,057  | 0,339 | 4,22E-13 |

|                                                     |                     |   |      |        |       |          |
|-----------------------------------------------------|---------------------|---|------|--------|-------|----------|
|                                                     |                     | 2 | 2366 | -0,027 | 0,326 |          |
| Myristoyl-Linoleoyl-Glycerol(14:0/18:2)[2]*         | Diacylglycerol      | 1 | 1634 | 0,046  | 0,336 | 9,13E-12 |
|                                                     |                     | 2 | 2939 | -0,024 | 0,333 |          |
| Palmitoleoyl-Oleoyl-Glycerol(16:1/18:1)[1]*         | Diacylglycerol      | 1 | 1221 | 0,042  | 0,370 | 1,35E-11 |
|                                                     |                     | 2 | 2147 | -0,046 | 0,359 |          |
| Palmitoyl-Linoleoyl Glycerol(16:0/18:2)[2]*         | Diacylglycerol      | 1 | 2174 | 0,021  | 0,268 | 2,48E-11 |
|                                                     |                     | 2 | 4148 | -0,027 | 0,268 |          |
| Palmitoyl-Oleoyl-Glycerol(16:0/18:1)[1]*            | Diacylglycerol      | 1 | 938  | 0,051  | 0,285 | 3,86E-11 |
|                                                     |                     | 2 | 1751 | -0,024 | 0,274 |          |
| Palmitoleoyl-Linoleoyl Glycerol(16:1/18:2)[1]*      | Diacylglycerol      | 1 | 2071 | 0,025  | 0,267 | 1,69E-10 |
|                                                     |                     | 2 | 3983 | -0,020 | 0,259 |          |
| Diacylglycerol(16:1/18:2[2],16:0/18:3[1])           | Diacylglycerol      | 1 | 1923 | 0,024  | 0,289 | 5,39E-09 |
|                                                     |                     | 2 | 3448 | -0,023 | 0,288 |          |
| Oleoyl-Arachidonoyl - Glycerol(18:1/20:4)[2]*       | Diacylglycerol      | 1 | 2277 | 0,018  | 0,252 | 9,09E-09 |
|                                                     |                     | 2 | 4310 | -0,019 | 0,245 |          |
| 1-Palmitoleoylglycerol(16:1)*                       | Monoacylglycerol    | 1 | 2401 | 0,038  | 0,260 | 2,20E-14 |
|                                                     |                     | 2 | 4605 | -0,012 | 0,255 |          |
| 1-Oleoylglycerol(18:1)                              | Monoacylglycerol    | 1 | 2373 | 0,030  | 0,229 | 1,02E-13 |
|                                                     |                     | 2 | 4580 | -0,011 | 0,215 |          |
| <b>Glycerophospholipids</b>                         |                     |   |      |        |       |          |
| 1-Stearoyl-2-Docosapentaenoyl-GPC(18:0/22:5n6)*     | Phosphatidylcholine | 1 | 2465 | 0,033  | 0,194 | 7,82E-33 |
|                                                     |                     | 2 | 4745 | -0,025 | 0,195 |          |
| 1-Stearoyl-2-Adrenoyl-GPC(18:0/22:4)*               | Phosphatidylcholine | 1 | 2477 | 0,033  | 0,185 | 1,52E-32 |
|                                                     |                     | 2 | 4771 | -0,022 | 0,184 |          |
| 1-Stearoyl-2-Dihomo-Linolenoyl-GPC(18:0/20:3n3or6)* | Phosphatidylcholine | 1 | 2481 | 0,018  | 0,130 | 4,20E-28 |
|                                                     |                     | 2 | 4775 | -0,018 | 0,132 |          |
| 1-Stearoyl-2-Meadoyl-GPC(18:0/20:3n9)*              | Phosphatidylcholine | 1 | 2373 | 0,042  | 0,250 | 1,33E-25 |
|                                                     |                     | 2 | 4579 | -0,025 | 0,251 |          |

|                                                     |                     |   |      |        |       |          |
|-----------------------------------------------------|---------------------|---|------|--------|-------|----------|
| 1-Palmitoyl-2-Meadoyl-GPC(16:0/20:3n9)*             | Phosphatidylcholine | 1 | 1808 | 0,039  | 0,221 | 1,42E-20 |
|                                                     |                     | 2 | 3436 | -0,021 | 0,220 |          |
| 1-Stearoyl-2-Oleoyl-GPC(18:0/18:1)                  | Phosphatidylcholine | 1 | 2478 | 0,017  | 0,117 | 8,27E-18 |
|                                                     |                     | 2 | 4770 | -0,007 | 0,113 |          |
| 1-Palmitoyl-2-Palmitoleoyl-GPC(16:0/16:1)*          | Phosphatidylcholine | 1 | 2484 | 0,034  | 0,206 | 2,04E-17 |
|                                                     |                     | 2 | 4784 | -0,008 | 0,199 |          |
| 1-Palmitoyl-2-Adrenoyl-GPC(16:0/22:4)*              | Phosphatidylcholine | 1 | 2478 | 0,015  | 0,181 | 6,11E-17 |
|                                                     |                     | 2 | 4766 | -0,023 | 0,183 |          |
| 1-Stearoyl-2-Arachidonoyl-GPC(18:0/20:4)            | Phosphatidylcholine | 1 | 2482 | 0,010  | 0,100 | 5,55E-15 |
|                                                     |                     | 2 | 4783 | -0,010 | 0,104 |          |
| 1-Margaroyl-2-Docosahexaenoyl-GPC(17:0/22:6)*       | Phosphatidylcholine | 1 | 2232 | -0,041 | 0,217 | 1,40E-14 |
|                                                     |                     | 2 | 4453 | 0,001  | 0,210 |          |
| 1-Palmitoyl-2-Arachidonoyl-GPC(16:0/20:4n6)         | Phosphatidylcholine | 1 | 2482 | 0,007  | 0,091 | 4,47E-14 |
|                                                     |                     | 2 | 4785 | -0,010 | 0,092 |          |
| 1-Oleoyl-2-Docosahexaenoyl-GPC(18:1/22:6)*          | Phosphatidylcholine | 1 | 2480 | -0,018 | 0,119 | 1,62E-13 |
|                                                     |                     | 2 | 4773 | 0,003  | 0,112 |          |
| 1-Palmitoyl-2-Oleoyl-GPC(16:0/18:1)                 | Phosphatidylcholine | 1 | 2481 | 0,009  | 0,084 | 4,60E-12 |
|                                                     |                     | 2 | 4777 | -0,005 | 0,082 |          |
| 1-Linoleoyl-2-Linolenoyl-GPC(18:2/18:3)*            | Phosphatidylcholine | 1 | 2454 | -0,027 | 0,212 | 1,98E-11 |
|                                                     |                     | 2 | 4751 | 0,009  | 0,210 |          |
| 1-Pentadecanoyl-2-Docosahexaenoyl-GPC(15:0/22:6)*   | Phosphatidylcholine | 1 | 2454 | -0,032 | 0,195 | 5,54E-11 |
|                                                     |                     | 2 | 4729 | -0,001 | 0,185 |          |
| Phosphatidylcholine(15:0/18:1,17:0/16:1,16:0/17:1)* | Phosphatidylcholine | 1 | 2478 | 0,009  | 0,141 | 3,75E-10 |
|                                                     |                     | 2 | 4770 | -0,013 | 0,134 |          |
| 1-Oleoyl-2-Dihomo-Linolenoyl-GPC(18:1/20:3)*        | Phosphatidylcholine | 1 | 2404 | 0,005  | 0,138 | 7,25E-10 |
|                                                     |                     | 2 | 4663 | -0,016 | 0,135 |          |
| 1,2-Dilinoleoyl-GPC(18:2/18:2)                      | Phosphatidylcholine | 1 | 2464 | -0,023 | 0,161 | 8,51E-10 |
|                                                     |                     | 2 | 4735 | 0,001  | 0,153 |          |
|                                                     | Phosphatidylcholine | 1 | 2484 | -0,011 | 0,136 | 9,08E-10 |

|                                                          |                          |   |      |        |       |          |
|----------------------------------------------------------|--------------------------|---|------|--------|-------|----------|
| Glycerophosphorylcholine(GPC)                            |                          | 2 | 4787 | 0,009  | 0,136 |          |
| 1-Palmitoyl-2-Dihomo-Linolenoyl-GPC(16:0/20:3n3or6)*     | Phosphatidylcholine      | 1 | 705  | 0,016  | 0,117 | 2,80E-09 |
|                                                          |                          | 2 | 1508 | -0,019 | 0,138 |          |
| 1-Myristoyl-2-Arachidonoyl-GPC(14:0/20:4)*               | Phosphatidylcholine      | 1 | 2476 | 0,009  | 0,198 | 1,84E-08 |
|                                                          |                          | 2 | 4769 | -0,018 | 0,198 |          |
| 1-(1-Enyl-Palmitoyl)-2-Linoleoyl-GPC(P-16:0/18:2)*       | Choline-Plasmalogen      | 1 | 2477 | -0,023 | 0,132 | 1,87E-25 |
|                                                          |                          | 2 | 4770 | 0,009  | 0,119 |          |
| 1-(1-Enyl-Stearoyl)-2-Docosahexaenoyl-GPC(P-18:0/22:6)*  | Choline-Plasmalogen      | 1 | 2473 | -0,031 | 0,163 | 5,78E-25 |
|                                                          |                          | 2 | 4768 | 0,010  | 0,157 |          |
| 1-(1-Enyl-Palmitoyl)-2-Docosahexaenoyl-GPC(P-16:0/22:6)* | Choline-Plasmalogen      | 1 | 2480 | -0,029 | 0,153 | 1,41E-17 |
|                                                          |                          | 2 | 4774 | 0,003  | 0,146 |          |
| 1-(1-Enyl-Stearoyl)-2-Linoleoyl-GPC(P-18:0/18:2)*        | Choline-Plasmalogen      | 1 | 2459 | -0,027 | 0,174 | 7,65E-16 |
|                                                          |                          | 2 | 4755 | 0,006  | 0,158 |          |
| 1-Palmityl-2-Oleoyl-GPC(O-16:0/18:1)*                    | Choline-Plasmalogen      | 1 | 2476 | -0,013 | 0,097 | 5,30E-13 |
|                                                          |                          | 2 | 4769 | 0,004  | 0,092 |          |
| 1-(1-Enyl-Palmitoyl)-2-Oleoyl-GPC(P-16:0/18:1)*          | Choline-Plasmalogen      | 1 | 2479 | -0,011 | 0,118 | 6,74E-09 |
|                                                          |                          | 2 | 4770 | 0,005  | 0,107 |          |
| 1-Docosahexaenoyl-GPC(22:6)*                             | Lyso-phosphatidylcholine | 1 | 2484 | -0,030 | 0,183 | 8,44E-20 |
|                                                          |                          | 2 | 4787 | 0,009  | 0,169 |          |
| 1-Eicosenoyl-GPC(20:1)*                                  | Lyso-phosphatidylcholine | 1 | 2479 | -0,014 | 0,133 | 3,59E-19 |
|                                                          |                          | 2 | 4775 | 0,015  | 0,130 |          |
| 1-Linoleoyl-GPC(18:2)                                    | Lyso-phosphatidylcholine | 1 | 2483 | -0,020 | 0,125 | 1,42E-17 |
|                                                          |                          | 2 | 4787 | 0,005  | 0,112 |          |
| 1-Nonadecanoyl-GPC(19:0)                                 | Lyso-phosphatidylcholine | 1 | 2291 | -0,029 | 0,175 | 3,82E-18 |
|                                                          |                          | 2 | 4486 | 0,008  | 0,161 |          |
| 1-Arachidoyl-GPC(20:0)                                   | Lyso-phosphatidylcholine | 1 | 2442 | -0,022 | 0,146 | 4,29E-17 |
|                                                          |                          | 2 | 4712 | 0,008  | 0,139 |          |
| 2-Docosahexaenoyl-GPC(22:6)*                             |                          | 1 | 2278 | -0,035 | 0,205 | 5,30E-15 |

|                                            |                               |   |      |        |       |          |
|--------------------------------------------|-------------------------------|---|------|--------|-------|----------|
|                                            | Lyso-phosphatidylcholine      | 2 | 4445 | 0,005  | 0,195 |          |
| 2-Linoleoyl-GPC(18:2)*                     | Lyso-phosphatidylcholine      | 1 | 2466 | -0,015 | 0,139 | 3,64E-13 |
|                                            |                               | 2 | 4761 | 0,009  | 0,135 |          |
| 1-Lignoceroyl-GPC(24:0)                    | Lyso-phosphatidylcholine      | 1 | 2149 | -0,022 | 0,154 | 5,54E-13 |
|                                            |                               | 2 | 4092 | 0,007  | 0,151 |          |
| 1-Docosapentaenoyl-GPC(22:5n3)*            | Lyso-phosphatidylcholine      | 1 | 2482 | -0,022 | 0,161 | 4,37E-12 |
|                                            |                               | 2 | 4787 | 0,005  | 0,149 |          |
| 1-Eicosapentaenoyl-GPC(20:5)*              | Lyso-phosphatidylcholine      | 1 | 2483 | -0,026 | 0,251 | 1,65E-11 |
|                                            |                               | 2 | 4787 | 0,015  | 0,242 |          |
| 1-Erucoyl-GPC(22:1)*                       | Lyso-phosphatidylcholine      | 1 | 1898 | 0,006  | 0,242 | 8,98E-10 |
|                                            |                               | 2 | 3653 | 0,048  | 0,245 |          |
| 1-Adrenoyl-GPC(22:4)*                      | Lyso-phosphatidylcholine      | 1 | 2472 | 0,010  | 0,171 | 1,06E-09 |
|                                            |                               | 2 | 4763 | -0,016 | 0,178 |          |
| 1-(1-Enyl-Palmitoyl)-GPC(P-16:0)*          | Lysophosphatidyl-choline (PI) | 1 | 2480 | -0,017 | 0,135 | 6,31E-15 |
|                                            |                               | 2 | 4781 | 0,009  | 0,131 |          |
| 1-(1-Enyl-Stearoyl)-GPC(P-18:0)*           | Lysophosphatidyl-choline (PI) | 1 | 2238 | -0,021 | 0,182 | 1,71E-11 |
|                                            |                               | 2 | 4344 | 0,010  | 0,174 |          |
| 1-(1-Enyl-Oleoyl)-GPC(P-18:1)*             | Lysophosphatidyl-choline (PI) | 1 | 2437 | -0,017 | 0,170 | 3,64E-11 |
|                                            |                               | 2 | 4710 | 0,010  | 0,164 |          |
| 1-Stearoyl-2-Oleoyl-GPE(18:0/18:1)         | Phosphatidyl-ethanolamine     | 1 | 2446 | 0,041  | 0,213 | 6,70E-26 |
|                                            |                               | 2 | 4710 | -0,014 | 0,205 |          |
| 1-Palmitoyl-2-Oleoyl-GPE(16:0/18:1)        | Phosphatidyl-ethanolamine     | 1 | 2449 | 0,040  | 0,217 | 1,60E-22 |
|                                            |                               | 2 | 4724 | -0,012 | 0,203 |          |
| 1-Stearoyl-2-Arachidonoyl-GPE(18:0/20:4)   | Phosphatidyl-ethanolamine     | 1 | 2474 | 0,022  | 0,164 | 5,78E-24 |
|                                            |                               | 2 | 4764 | -0,016 | 0,153 |          |
| 1-Palmitoyl-2-Arachidonoyl-GPE(16:0/20:4)* | Phosphatidyl-ethanolamine     | 1 | 2467 | 0,022  | 0,187 | 1,33E-14 |
|                                            |                               | 2 | 4756 | -0,013 | 0,175 |          |
| 1-Stearoyl-2-Linoleoyl-GPE(18:0/18:2)*     |                               | 1 | 2464 | 0,028  | 0,211 | 6,10E-14 |

|                                                         |                                  |   |      |        |       |          |
|---------------------------------------------------------|----------------------------------|---|------|--------|-------|----------|
|                                                         | Phosphatidyl-ethanolamine        | 2 | 4749 | -0,010 | 0,199 |          |
| 1-Palmitoyl-2-Palmitoleoyl-GPE(16:0/16:1)*              | Phosphatidyl-ethanolamine        | 1 | 1640 | 0,060  | 0,307 | 2,63E-13 |
|                                                         |                                  | 2 | 2730 | -0,007 | 0,288 |          |
| 1-(1-Enyl-Oleoyl)-2-Docosahexaenoyl-GPE(P-18:1/22:6)*   | Ethanolamine-Plasmalogen         | 1 | 2452 | -0,027 | 0,182 | 3,10E-12 |
|                                                         |                                  | 2 | 4746 | 0,004  | 0,173 |          |
| 1-(1-Enyl-Stearoyl)-2-Docosahexaenoyl-GPE(P-18:0/22:6)* | Ethanolamine-Plasmalogen         | 1 | 2471 | -0,021 | 0,149 | 7,29E-11 |
|                                                         |                                  | 2 | 4761 | 0,003  | 0,144 |          |
| 1-Palmitoleoyl-GPE(16:1)*                               | Lysophosphatidyl-ethanolamine    | 1 | 2066 | 0,042  | 0,279 | 1,71E-10 |
|                                                         |                                  | 2 | 3756 | -0,007 | 0,276 |          |
| 1-Palmitoyl-2-Oleoyl-GPI(16:0/18:1)*                    | Phosphoinositol                  | 1 | 2432 | 0,023  | 0,187 | 2,08E-11 |
|                                                         |                                  | 2 | 4683 | -0,007 | 0,175 |          |
| 1-Palmitoleoyl-GPI(16:1)*                               | Phosphoinositol                  | 1 | 1841 | 0,041  | 0,329 | 5,62E-09 |
|                                                         |                                  | 2 | 3278 | -0,014 | 0,322 |          |
| 1-Palmitoyl-2-Arachidonoyl-GPI(16:0/20:4)*              | Phosphoinositol                  | 1 | 2353 | 0,016  | 0,161 | 1,09E-08 |
|                                                         |                                  | 2 | 4482 | -0,008 | 0,162 |          |
| 1-Stearoyl-GPG(18:0)                                    | Lyso-phosphoglycerol             | 1 | 1747 | 0,020  | 0,172 | 7,36E-10 |
|                                                         |                                  | 2 | 3205 | -0,011 | 0,171 |          |
| 1-Oleoyl-GPG(18:1)*                                     | Lyso-phosphoglycerol             | 1 | 1658 | 0,017  | 0,171 | 3,05E-08 |
|                                                         |                                  | 2 | 3309 | -0,012 | 0,169 |          |
| Fatty acids and fatty acids derivatives                 |                                  |   |      |        |       |          |
| Hydroxy-CMPF*                                           | Furanoid fatty acid derivative   | 1 | 2484 | -0,108 | 0,375 | 3,46E-30 |
|                                                         |                                  | 2 | 4787 | -0,010 | 0,332 |          |
| 3-Carboxy-4-Methyl-5-Propyl-2-Furanpropanoate(CMPF)     | Furanoid fatty acid derivative   | 1 | 2484 | -0,105 | 0,431 | 3,67E-12 |
|                                                         |                                  | 2 | 4787 | -0,037 | 0,382 |          |
| Docosahexaenoate(DHA;22:6n3)                            | PUFA- Very long chain fatty acid | 1 | 2484 | -0,036 | 0,221 | 7,01E-19 |
|                                                         |                                  | 2 | 4787 | 0,011  | 0,210 |          |
| Docosapentaenoate (N3dpa;22:5n3)                        | PUFA- Very long chain fatty acid | 1 | 2484 | -0,020 | 0,199 | 5,44E-11 |
|                                                         |                                  | 2 | 4787 | 0,012  | 0,197 |          |

|                                       |                              |   |      |        |       |          |
|---------------------------------------|------------------------------|---|------|--------|-------|----------|
| Erucate(22:1n9)                       | Very long chain fatty acid   | 1 | 2484 | -0,007 | 0,219 | 6,66E-09 |
|                                       |                              | 2 | 4787 | 0,025  | 0,224 |          |
| 2-Hydroxyarachidate*                  | Long chain fatty acids       | 1 | 2364 | 0,016  | 0,125 | 1,43E-15 |
|                                       |                              | 2 | 4545 | -0,009 | 0,118 |          |
| Eicosapentaenoate(EPA;20:5n3)         | PUFA - Long chain fatty acid | 1 | 2484 | -0,027 | 0,236 | 3,28E-14 |
|                                       |                              | 2 | 4787 | 0,017  | 0,230 |          |
| Linolenate[Alphaorgamma; (18:3n3or6)] | PUFA - Long chain fatty acid | 1 | 2484 | -0,026 | 0,193 | 8,14E-10 |
|                                       |                              | 2 | 4787 | 0,003  | 0,192 |          |
| Stearidonate(18:4n3)                  | PUFA - Long chain fatty acid | 1 | 2483 | -0,017 | 0,221 | 1,14E-08 |
|                                       |                              | 2 | 4787 | 0,014  | 0,218 |          |
| (2or3)-Decenoate(10:1n7orn8)          | Medium chain fatty acids     | 1 | 2456 | -0,030 | 0,181 | 1,23E-17 |
|                                       |                              | 2 | 4740 | 0,009  | 0,184 |          |
| 3-Hydroxydecanoate                    | 3-hydroxyacyl CoAs           | 1 | 2484 | -0,022 | 0,170 | 6,24E-16 |
|                                       |                              | 2 | 4787 | 0,013  | 0,173 |          |
| Docosahexaenoylcholine                | Acyl choline                 | 1 | 2454 | -0,039 | 0,277 | 3,79E-11 |
|                                       |                              | 2 | 4742 | 0,005  | 0,261 |          |
| Heneicosapentaenoate(21:5n3)          | PUFA – Long chain fatty acid | 1 | 2196 | -0,054 | 0,382 | 3,94E-11 |
|                                       |                              | 2 | 4461 | 0,012  | 0,376 |          |
| Sphingolipids                         |                              |   |      |        |       |          |
| Sphingomyelin(D18:0/18:0,D19:0/17:0)* | Sphingomyelin                | 1 | 2475 | 0,039  | 0,209 | 1,32E-28 |
|                                       |                              | 2 | 4762 | -0,018 | 0,207 |          |
| N-Stearoyl-Sphingosine(D18:1/18:0)*   | Sphingomyelin                | 1 | 1884 | 0,024  | 0,150 | 2,50E-26 |
|                                       |                              | 2 | 3466 | -0,023 | 0,152 |          |
| Sphingomyelin(D18:0/20:0,D16:0/22:0)* | Sphingomyelin                | 1 | 2450 | 0,022  | 0,187 | 4,93E-15 |
|                                       |                              | 2 | 4704 | -0,015 | 0,192 |          |
| Hexadecasphingosine(D16:1)*           | Sphingomyelin                | 1 | 1820 | 0,014  | 0,166 | 6,20E-10 |
|                                       |                              | 2 | 3347 | -0,015 | 0,161 |          |
| N-Palmitoyl-Sphinganine(D18:0/16:0)   | Ceramide                     | 1 | 2062 | 0,023  | 0,174 | 9,42E-16 |
|                                       |                              | 2 | 3828 | -0,015 | 0,170 |          |

|                                             |                                  |   |      |        |       |          |
|---------------------------------------------|----------------------------------|---|------|--------|-------|----------|
| N-Palmitoyl-Sphingosine(D18:1/16:0)         | Ceramide                         | 1 | 2484 | 0,011  | 0,109 | 1,13E-13 |
|                                             |                                  | 2 | 4787 | -0,008 | 0,104 |          |
| N-Stearoyl-Sphinganine(D18:0/18:0)*         | Ceramide                         | 1 | 1196 | 0,036  | 0,280 | 6,20E-13 |
|                                             |                                  | 2 | 1952 | -0,038 | 0,281 |          |
| N-Stearoyl-Sphingadienine(D18:2/18:0)*      | Ceramide                         | 1 | 1947 | 0,011  | 0,185 | 1,10E-12 |
|                                             |                                  | 2 | 3570 | -0,027 | 0,188 |          |
| Ceramide(D18:1/20:0,D16:1/22:0,D20:1/18:0)* | Ceramide                         | 1 | 1645 | 0,014  | 0,149 | 1,03E-10 |
|                                             |                                  | 2 | 3063 | -0,015 | 0,146 |          |
| Sphingosine1-Phosphate                      | Phosphosphingolipid              | 1 | 2483 | 0,008  | 0,116 | 7,75E-09 |
|                                             |                                  | 2 | 4787 | -0,008 | 0,109 |          |
| Sphinganine-1-Phosphate                     | Phosphosphingolipid              | 1 | 2313 | 0,008  | 0,153 | 1,43E-08 |
|                                             |                                  | 2 | 4364 | -0,014 | 0,147 |          |
| Acyl Carnitines                             |                                  |   |      |        |       |          |
| Butyrylcarnitine(C4)                        | Acyl carnitine<br>(short chain)  | 1 | 2479 | 0,052  | 0,214 | 8,28E-18 |
|                                             |                                  | 2 | 4768 | 0,007  | 0,213 |          |
| Propionylcarnitine(C3)                      | Acyl carnitine<br>(short chain)  | 1 | 2484 | 0,019  | 0,136 | 2,61E-17 |
|                                             |                                  | 2 | 4787 | -0,011 | 0,141 |          |
| Linolenoylcarnitine(C18:3)*                 | Acyl carnitine<br>(long chain)   | 1 | 2333 | -0,022 | 0,166 | 1,07E-12 |
|                                             |                                  | 2 | 4536 | 0,008  | 0,163 |          |
| Hexanoylcarnitine(C6)                       | Acyl carnitine<br>(short chain)  | 1 | 2484 | 0,021  | 0,174 | 2,11E-12 |
|                                             |                                  | 2 | 4787 | -0,009 | 0,167 |          |
| Linoleoylcarnitine(C18:2)*                  | Acyl carnitine<br>(long chain)   | 1 | 2484 | -0,012 | 0,133 | 1,46E-11 |
|                                             |                                  | 2 | 4786 | 0,010  | 0,131 |          |
| Succinylcarnitine(C4-DC)                    | Acyl carnitine<br>(short chain)  | 1 | 2468 | 0,011  | 0,139 | 2,06E-11 |
|                                             |                                  | 2 | 4756 | -0,012 | 0,138 |          |
| Isovalerylcarnitine(C5)                     | Acyl carnitine<br>(short chain)  | 1 | 2484 | 0,010  | 0,147 | 1,32E-10 |
|                                             |                                  | 2 | 4786 | -0,013 | 0,143 |          |
| 3-Hydroxydecanoylcarnitine                  | Acyl carnitine<br>(medium chain) | 1 | 2331 | -0,028 | 0,202 | 5,73E-09 |
|                                             |                                  | 2 | 4444 | 0,003  | 0,208 |          |



|                                          |                                   |   |      |        |       |          |
|------------------------------------------|-----------------------------------|---|------|--------|-------|----------|
| Adipoylcarnitine(C6-DC)                  | Acyl carnitine<br>(medium chain)  | 1 | 2464 | 0,029  | 0,212 | 1,27E-08 |
|                                          |                                   | 2 | 4751 | 0,001  | 0,198 |          |
| 2-Methylbutyrylcarnitine(C5)             | Acyl carnitine<br>(short chain)   | 1 | 2118 | 0,011  | 0,150 | 1,52E-08 |
|                                          |                                   | 2 | 4042 | -0,011 | 0,146 |          |
| Bile Acids                               |                                   |   |      |        |       |          |
| Glycoursodeoxycholic acid sulfate(1)     | Secondary bile acid               | 1 | 1551 | 0,076  | 0,436 | 3,62E-12 |
|                                          |                                   | 2 | 2567 | -0,017 | 0,402 |          |
| Glycoursodeoxycholate                    | Secondary bile acid               | 1 | 2427 | 0,054  | 0,474 | 5,19E-10 |
|                                          |                                   | 2 | 4660 | -0,018 | 0,450 |          |
| Steroids                                 |                                   |   |      |        |       |          |
| Cortoloneglucuronide(1)                  | Steroidal glycoside               | 1 | 2345 | 0,015  | 0,175 | 1,88E-21 |
|                                          |                                   | 2 | 4458 | -0,028 | 0,177 |          |
| Tetrahydrocortisol glucuronide           | Steroidal taurinated<br>bile acid | 1 | 2459 | 0,007  | 0,176 | 1,16E-09 |
|                                          |                                   | 2 | 4729 | -0,019 | 0,174 |          |
| Pregnenetriol disulfate*                 | Pregnane steroid                  | 1 | 2483 | 0,012  | 0,257 | 1,34E-09 |
|                                          |                                   | 2 | 4787 | -0,026 | 0,248 |          |
| Androstenediol(3beta,17beta)Disulfate(1) | Sulfated steroid                  | 1 | 2484 | 0,036  | 0,349 | 1,12E-08 |
|                                          |                                   | 2 | 4787 | -0,010 | 0,319 |          |
| Amino acids                              |                                   |   |      |        |       |          |
| Glutamate                                | -                                 | 1 | 2484 | 0,017  | 0,159 | 1,36E-18 |
|                                          |                                   | 2 | 4787 | -0,019 | 0,162 |          |
| Creatine                                 | -                                 | 1 | 2484 | 0,022  | 0,190 | 4,92E-18 |
|                                          |                                   | 2 | 4787 | -0,019 | 0,189 |          |
| Tyrosine                                 | -                                 | 1 | 2484 | 0,008  | 0,082 | 1,03E-08 |
|                                          |                                   | 2 | 4785 | -0,003 | 0,078 |          |
| Aspartate                                | -                                 | 1 | 2484 | 0,015  | 0,130 | 3,47E-15 |
|                                          |                                   | 2 | 4786 | -0,011 | 0,130 |          |
| N-Acetyltryptophan                       |                                   | 1 | 2447 | 0,020  | 0,157 | 1,59E-17 |

|                             |                                      |   |      |        |       |          |
|-----------------------------|--------------------------------------|---|------|--------|-------|----------|
|                             | N-acyl-L-alpha-amino acids           | 2 | 4701 | -0,013 | 0,152 |          |
| N-Acetylphenylalanine       | N-acyl-L-alpha amino acid            | 1 | 2428 | 0,026  | 0,173 | 6,03E-12 |
|                             |                                      | 2 | 4665 | -0,003 | 0,161 |          |
| N-Acetyltyrosine            | N-acyl-L-alpha amino acid            | 1 | 2441 | 0,022  | 0,172 | 1,12E-11 |
|                             |                                      | 2 | 4675 | -0,006 | 0,163 |          |
| Cinnamoylglycine            | N-acyl-alpha amino acids             | 1 | 2285 | -0,139 | 0,505 | 2,62E-10 |
|                             |                                      | 2 | 4495 | -0,060 | 0,483 |          |
| Indolepropionate            | Indole derivative (Tryptophan)       | 1 | 2458 | -0,058 | 0,362 | 3,08E-17 |
|                             |                                      | 2 | 4742 | 0,018  | 0,360 |          |
| Indolelactate               | Indole derivative (Tryptophan)       | 1 | 2484 | -0,012 | 0,121 | 1,03E-08 |
|                             |                                      | 2 | 4787 | 0,004  | 0,115 |          |
| Gamma-Glutamylisoleucine*   | Gamma-glutamyl amino acid            | 1 | 2481 | 0,026  | 0,173 | 2,78E-15 |
|                             |                                      | 2 | 4781 | -0,007 | 0,168 |          |
| Gamma-Glutamylglutamate     | Gamma-glutamyl-amino acid            | 1 | 2430 | 0,033  | 0,213 | 1,06E-12 |
|                             |                                      | 2 | 4668 | -0,003 | 0,202 |          |
| Gamma-Glutamylvaline        | Gamma-glutamyl amino acid            | 1 | 2480 | 0,023  | 0,170 | 3,14E-09 |
|                             |                                      | 2 | 4777 | -0,001 | 0,159 |          |
| Gamma-Glutamylphenylalanine | Gamma-glutamyl amino acid            | 1 | 2483 | 0,011  | 0,094 | 6,47E-09 |
|                             |                                      | 2 | 4786 | -0,003 | 0,094 |          |
| Formiminoglutamate          | Glutamic acid and derivatives        | 1 | 1775 | 0,033  | 0,191 | 1,96E-14 |
|                             |                                      | 2 | 3262 | -0,010 | 0,191 |          |
| Phenyllactate(PLA)          | Phenylpropanoic acid (Phenylalanine) | 1 | 2484 | -0,012 | 0,125 | 1,91E-13 |
|                             |                                      | 2 | 4787 | 0,011  | 0,126 |          |
| Cysteines-Sulfate           | L-alpha amino acid                   | 1 | 2349 | 0,008  | 0,204 | 3,49E-13 |
|                             |                                      | 2 | 4545 | -0,029 | 0,200 |          |
| 5-Hydroxylysine             | L-alpha amino acid                   | 1 | 2424 | 0,018  | 0,130 | 6,78E-13 |
|                             |                                      | 2 | 4627 | -0,005 | 0,125 |          |
| 4-Hydroxyglutamate          | L-alpha-amino acid                   | 1 | 1915 | 0,013  | 0,213 | 9,43E-12 |

|                             |                              |   |      |        |       |          |
|-----------------------------|------------------------------|---|------|--------|-------|----------|
|                             |                              | 2 | 3420 | -0,028 | 0,210 |          |
| 1-Carboxyethylphenylalanine | L-alpha amino acid           | 1 | 2468 | 0,019  | 0,166 | 1,60E-11 |
|                             |                              | 2 | 4752 | -0,007 | 0,154 |          |
| Stachydrine                 | L-alpha amino acid (Proline) | 1 | 2484 | -0,171 | 0,608 | 2,03E-11 |
|                             |                              | 2 | 4787 | -0,072 | 0,589 |          |
| Methioninesulfoxide         | L-alpha-amino acid           | 1 | 2484 | -0,004 | 0,106 | 9,93E-10 |
|                             |                              | 2 | 4787 | 0,013  | 0,109 |          |
| N-Delta-Acetylornithine     | L-alpha-amino acid           | 1 | 2481 | -0,034 | 0,235 | 5,36E-09 |
|                             |                              | 2 | 4786 | 0,000  | 0,231 |          |
| Cysteinesulfinicacid        | L-alpha-amino acid           | 1 | 2160 | 0,012  | 0,141 | 7,77E-09 |
|                             |                              | 2 | 4045 | -0,010 | 0,142 |          |
| 2-Oxoarginine*              | Keto acid                    | 1 | 2280 | 0,031  | 0,192 | 6,73E-11 |
|                             |                              | 2 | 4352 | -0,001 | 0,180 |          |
| Alpha-Ketoglutaramate*      | Keto acid                    | 1 | 2480 | -0,007 | 0,101 | 8,20E-10 |
|                             |                              | 2 | 4780 | 0,007  | 0,093 |          |
| Alpha-Ketoglutarate         | Keto acid                    | 1 | 2483 | 0,019  | 0,137 | 9,34E-10 |
|                             |                              | 2 | 4785 | 0,000  | 0,118 |          |
| 1-Carboxyethylvaline        | Carboxylic acid (Valine)     | 1 | 2383 | 0,015  | 0,187 | 1,32E-10 |
|                             |                              | 2 | 4585 | -0,015 | 0,178 |          |
| 1-Carboxyethylleucine       | Carboxylic acid (Leucine)    | 1 | 2065 | 0,010  | 0,180 | 5,50E-10 |
|                             |                              | 2 | 3876 | -0,019 | 0,173 |          |
| Guanidinosuccinate          | Carboxylic acid (Aspartate)  | 1 | 1447 | -0,036 | 0,243 | 9,58E-10 |
|                             |                              | 2 | 3169 | 0,010  | 0,227 |          |
| Carnitine                   | Carnitine                    | 1 | 2482 | 0,005  | 0,064 | 1,56E-15 |
|                             |                              | 2 | 4781 | -0,007 | 0,064 |          |
| Organic compounds           |                              |   |      |        |       |          |
| Imidazoles                  |                              |   |      |        |       |          |
| Imidazolelactate            | Imidazole                    | 1 | 2480 | -0,021 | 0,139 | 5,90E-28 |

|                                                  |              |   |      |        |       |          |
|--------------------------------------------------|--------------|---|------|--------|-------|----------|
|                                                  |              | 2 | 4782 | 0,018  | 0,146 |          |
| 1-Methyl-5-Imidazoleacetate                      | Imidazole    | 1 | 2462 | -0,066 | 0,404 | 9,25E-16 |
|                                                  |              | 2 | 4748 | 0,013  | 0,393 |          |
| 1-Ribosyl-Imidazoleacetate*                      | Imidazole    | 1 | 2478 | -0,010 | 0,176 | 2,66E-09 |
|                                                  |              | 2 | 4780 | 0,015  | 0,171 |          |
| 1-Methyl-5-Imidazolelactate                      | Imidazole    | 1 | 2318 | -0,058 | 0,383 | 3,00E-09 |
|                                                  |              | 2 | 4548 | -0,001 | 0,375 |          |
| Aryl sulfates                                    |              |   |      |        |       |          |
| O-Cresolsulfate                                  | Aryl sulfate | 1 | 2137 | 0,113  | 0,486 | 3,23E-17 |
|                                                  |              | 2 | 3859 | 0,006  | 0,459 |          |
| 2-Aminophenolsulfate                             | Aryl sulfate | 1 | 2476 | -0,087 | 0,365 | 4,19E-11 |
|                                                  |              | 2 | 4780 | -0,029 | 0,355 |          |
| Catecholsulfate                                  | Aryl sulfate | 1 | 2484 | -0,047 | 0,298 | 1,01E-10 |
|                                                  |              | 2 | 4787 | 0,000  | 0,290 |          |
| 4-Allylphenol sulfate                            | Aryl sulfate | 1 | 2480 | -0,024 | 0,418 | 4,69E-09 |
|                                                  |              | 2 | 4779 | 0,035  | 0,410 |          |
| Methyl-4-Hydroxybenzoatesulfate                  | Aryl sulfate | 1 | 2328 | -0,044 | 0,715 | 2,34E-08 |
|                                                  |              | 2 | 4607 | 0,058  | 0,713 |          |
| Bilirubins                                       |              |   |      |        |       |          |
| Bilirubin(Z,Z)                                   | Bilirubin    | 1 | 2484 | -0,015 | 0,181 | 2,77E-13 |
|                                                  |              | 2 | 4786 | 0,016  | 0,172 |          |
| Bilirubin(E,Zorz,E)*                             | Bilirubin    | 1 | 2107 | -0,018 | 0,185 | 5,14E-11 |
|                                                  |              | 2 | 3930 | 0,014  | 0,177 |          |
| Biliverdin                                       | Bilirubin    | 1 | 2483 | -0,017 | 0,218 | 9,67E-10 |
|                                                  |              | 2 | 4787 | 0,016  | 0,211 |          |
| Bilirubin degradation product<br>C17H18N2O4(2)** | -            | 1 | 2484 | -0,023 | 0,217 | 1,27E-08 |
|                                                  |              | 2 | 4787 | 0,007  | 0,212 |          |
|                                                  | -            | 1 | 2484 | -0,026 | 0,221 | 1,44E-08 |

|                                                  |                               |   |      |        |       |          |
|--------------------------------------------------|-------------------------------|---|------|--------|-------|----------|
| Bilirubin degradation product<br>C17H18N2O4(1)** |                               | 2 | 4787 | 0,004  | 0,214 |          |
| Bilirubin degradation product<br>C16H18N2O5(2)** | -                             | 1 | 2482 | -0,025 | 0,242 | 2,83E-08 |
|                                                  |                               | 2 | 4784 | 0,009  | 0,240 |          |
| Carboxylic acids                                 |                               |   |      |        |       |          |
| Tartronate(Hydroxymalonate)                      | Dicarboxylic acid             | 1 | 2477 | -0,051 | 0,205 | 6,19E-22 |
|                                                  |                               | 2 | 4784 | -0,006 | 0,177 |          |
| Oxalate(Ethanedioate)                            | Dicarboxylic acid             | 1 | 2484 | -0,045 | 0,165 | 3,29E-21 |
|                                                  |                               | 2 | 4787 | -0,010 | 0,143 |          |
| Octadecadienedioate(C18:2-DC)*                   | Dicarboxylic acid             | 1 | 2478 | -0,021 | 0,227 | 4,81E-13 |
|                                                  |                               | 2 | 4782 | 0,018  | 0,220 |          |
| Hydroxy acids                                    |                               |   |      |        |       |          |
| 2R,3R-Dihydroxybutyrate                          | Hydroxy acid                  | 1 | 2483 | 0,015  | 0,140 | 1,34E-11 |
|                                                  |                               | 2 | 4785 | -0,007 | 0,129 |          |
| 3-Hydroxylaurate                                 | Hydroxy acid                  | 1 | 2484 | -0,026 | 0,198 | 2,88E-11 |
|                                                  |                               | 2 | 4785 | 0,007  | 0,201 |          |
| 3-Hydroxyoctanoate                               | Hydroxy acid                  | 1 | 2482 | -0,018 | 0,171 | 1,04E-10 |
|                                                  |                               | 2 | 4785 | 0,010  | 0,175 |          |
| 3-Hydroxydodecanedioate*                         | Hydroxy acid                  | 1 | 1750 | -0,018 | 0,303 | 2,05E-09 |
|                                                  |                               | 2 | 3541 | 0,035  | 0,308 |          |
| Other organic compounds                          |                               |   |      |        |       |          |
| 2-Naptholsulfate                                 | Naphtalene                    | 1 | 2351 | 0,124  | 0,443 | 7,45E-32 |
|                                                  |                               | 2 | 4461 | -0,002 | 0,404 |          |
| 2,6-Dihydroxybenzoicacid                         | Benzoic acids and derivatives | 1 | 2484 | -0,049 | 0,305 | 3,44E-21 |
|                                                  |                               | 2 | 4787 | 0,021  | 0,293 |          |
| 2-Hydroxyfluorenesulfate                         | Fluorene                      | 1 | 1667 | 0,090  | 0,385 | 1,52E-17 |
|                                                  |                               | 2 | 2742 | -0,010 | 0,372 |          |
| (2,4or2,5)-Dimethylphenolsulfate                 | Xylene                        | 1 | 1855 | 0,076  | 0,467 | 2,57E-16 |
|                                                  |                               | 2 | 3129 | -0,036 | 0,470 |          |

|                                             |                             |   |      |        |       |          |
|---------------------------------------------|-----------------------------|---|------|--------|-------|----------|
| Cotinine                                    | Pyrrolidinylpyridine        | 1 | 969  | 0,286  | 1,274 | 1,49E-11 |
|                                             |                             | 2 | 1462 | -0,069 | 1,258 |          |
| 4-Hydroxychlorothalonil                     | Benzenoid                   | 1 | 2155 | -0,031 | 0,281 | 2,04E-10 |
|                                             |                             | 2 | 4232 | 0,017  | 0,292 |          |
| Hydroxycotinine                             | Pyrrolidinylpyridine        | 1 | 665  | -0,039 | 0,485 | 6,89E-10 |
|                                             |                             | 2 | 745  | -0,217 | 0,581 |          |
| Pyridoxate                                  | Pyridinecarboxylic acids    | 1 | 2484 | 0,010  | 0,220 | 6,13E-11 |
|                                             |                             | 2 | 4787 | 0,046  | 0,218 |          |
| Sphingosine                                 | Amine                       | 1 | 2424 | 0,021  | 0,190 | 2,63E-10 |
|                                             |                             | 2 | 4656 | -0,008 | 0,179 |          |
| Sphinganine                                 | Amine                       | 1 | 2250 | 0,017  | 0,176 | 7,31E-09 |
|                                             |                             | 2 | 4289 | -0,009 | 0,168 |          |
| 5-Methylthioadenosine(MTA)                  | Nucleoside                  | 1 | 2480 | 0,011  | 0,124 | 1,70E-09 |
|                                             |                             | 2 | 4784 | -0,007 | 0,119 |          |
| Gamma-CEHC                                  | Benzopyran                  | 1 | 2473 | -0,032 | 0,234 | 1,22E-08 |
|                                             |                             | 2 | 4773 | 0,001  | 0,232 |          |
| N-Acetylkynurenine(2)                       | Alkyl-phenylketones         | 1 | 2184 | 0,030  | 0,282 | 1,60E-08 |
|                                             |                             | 2 | 4105 | -0,011 | 0,271 |          |
| Carbohydrates and carbohydrates derivatives |                             |   |      |        |       |          |
| Glycerate                                   | Sugar acids and derivatives | 1 | 2482 | -0,041 | 0,140 | 1,22E-25 |
|                                             |                             | 2 | 4785 | -0,008 | 0,122 |          |
| Threonate                                   | Sugar acids and derivatives | 1 | 2482 | -0,026 | 0,206 | 5,82E-13 |
|                                             |                             | 2 | 4784 | 0,009  | 0,188 |          |
| Mannose                                     | -                           | 1 | 2483 | 0,009  | 0,098 | 2,90E-20 |
|                                             |                             | 2 | 4785 | -0,013 | 0,094 |          |
| Methylglucopyranoside(Alpha+Beta)           | O-glycosyl compounds        | 1 | 2303 | -0,013 | 0,391 | 2,47E-11 |
|                                             |                             | 2 | 4577 | 0,053  | 0,381 |          |
| Pyruvate                                    | -                           | 1 | 2483 | 0,011  | 0,128 | 6,87E-11 |

|                                           |                        |   |      |        |       |          |
|-------------------------------------------|------------------------|---|------|--------|-------|----------|
|                                           |                        | 2 | 4784 | -0,009 | 0,120 |          |
| N-Acetylglucosamine/N-Acetylgalactosamine | Acyl-aminosugars       | 1 | 2461 | 0,007  | 0,116 | 1,50E-10 |
|                                           |                        | 2 | 4710 | -0,012 | 0,115 |          |
| Lactate                                   | -                      | 1 | 2483 | 0,013  | 0,114 | 4,69E-09 |
|                                           |                        | 2 | 4785 | -0,002 | 0,106 |          |
| N-Acetylneuraminate                       | N-acylneuraminic acids | 1 | 2482 | 0,014  | 0,123 | 3,04E-08 |
|                                           |                        | 2 | 4780 | -0,002 | 0,118 |          |
| Other metabolites                         |                        |   |      |        |       |          |
| Branchedchain14:0dicarboxylicacid**       | -                      | 1 | 2448 | -0,084 | 0,333 | 2,27E-24 |
|                                           |                        | 2 | 4736 | -0,002 | 0,316 |          |
| Methylnaphthylsulfate(2)*                 | -                      | 1 | 1566 | 0,152  | 0,503 | 2,77E-21 |
|                                           |                        | 2 | 2460 | 0,004  | 0,470 |          |
| Dodecadienoate(12:2)*                     | -                      | 1 | 2484 | -0,024 | 0,159 | 1,86E-17 |
|                                           |                        | 2 | 4787 | 0,009  | 0,156 |          |
| 4-Methoxyphenolsulfate                    | -                      | 1 | 2399 | -0,082 | 0,357 | 4,02E-17 |
|                                           |                        | 2 | 4651 | -0,007 | 0,350 |          |
| Mannonate*                                | -                      | 1 | 2482 | 0,019  | 0,130 | 2,83E-11 |
|                                           |                        | 2 | 4783 | -0,001 | 0,119 |          |
| Hydroxyasparagine**                       | -                      | 1 | 2479 | 0,013  | 0,100 | 6,57E-11 |
|                                           |                        | 2 | 4776 | -0,002 | 0,093 |          |
| Cis-3,4-Methyleneheptanoate               | -                      | 1 | 2469 | -0,042 | 0,258 | 1,83E-10 |
|                                           |                        | 2 | 4774 | -0,003 | 0,249 |          |
| 2-Acetamidophenolsulfate                  | -                      | 1 | 2043 | -0,073 | 0,388 | 5,74E-10 |
|                                           |                        | 2 | 4079 | -0,009 | 0,377 |          |
| Metaboloniclactonesulfate                 | -                      | 1 | 2455 | 0,007  | 0,290 | 1,85E-09 |
|                                           |                        | 2 | 4746 | -0,037 | 0,290 |          |
| Pentose acid*                             | -                      | 1 | 2353 | -0,014 | 0,240 | 6,73E-09 |
|                                           |                        | 2 | 4590 | 0,021  | 0,231 |          |

Abbreviations: PI, plasmalogen; PUFA, polyunsaturated fatty acid.

\*200 most significant associations are shown; 1260 metabolites were included in the analysis. \*\*P values were calculated using one-way ANOVA. Novel metabolites associated with physical exercise are underlined.
